# Supplementary material for: Citizen science as a tool for arboviral vector surveillance in a resourced-constrained setting: results of a pilot study in Honiara, Solomon Islands, 2019
Source: Springer Nature journal article supplement (doi:10.1186/s12889-021-10493-6), 2021-03-16
Supplement: MOESM1 [file 18971748]

**SOLOMON ISLANDS CITIZEN SCIENCE SURVEILLANCE PROJECT, 2019**

**Simplified mosquito identification card**

***Aedes aegypti***

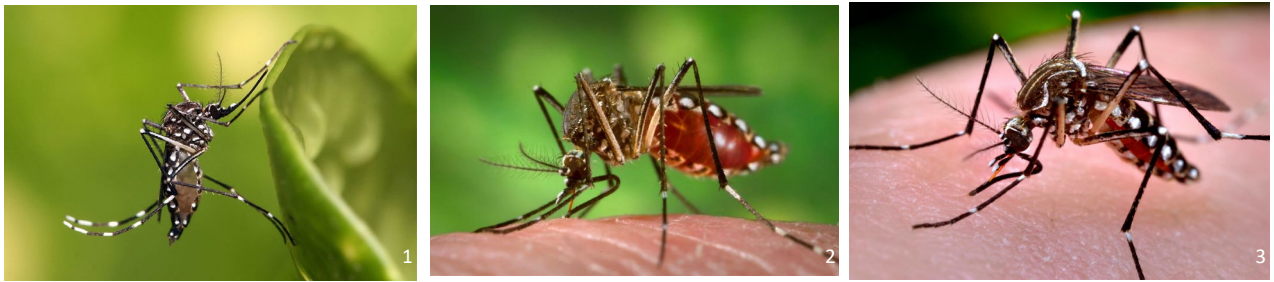

- Small to medium-sized mosquito, measuring approximately 4-7 mm in length
- White banding around their legs
- Double white stripes down the middle of their back (thorax).
- Wings without patched markings

***Aedes albopictus***

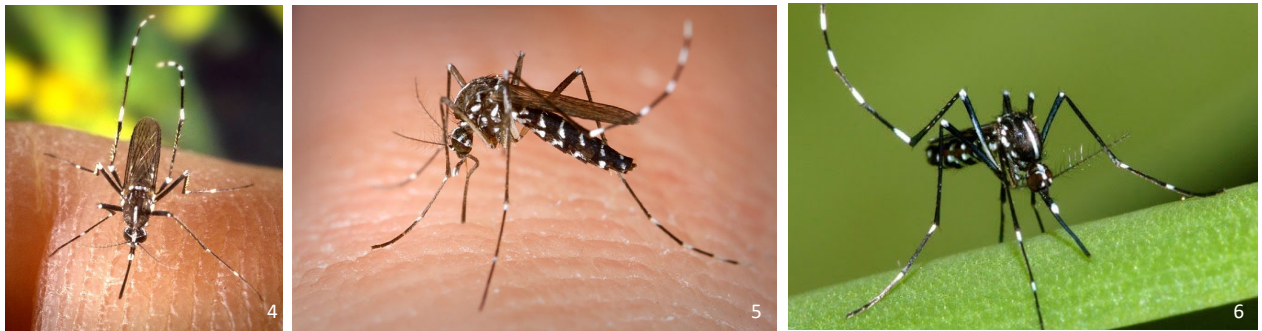

- Looks similar to the *Aedes aegypti* mosquito but is smaller (between 2-6 mm in length)
- White bands around their legs
- A single, silvery-white stripe down the middle of their back (thorax)
- Wings without patched markings

***Anopheles farauti***

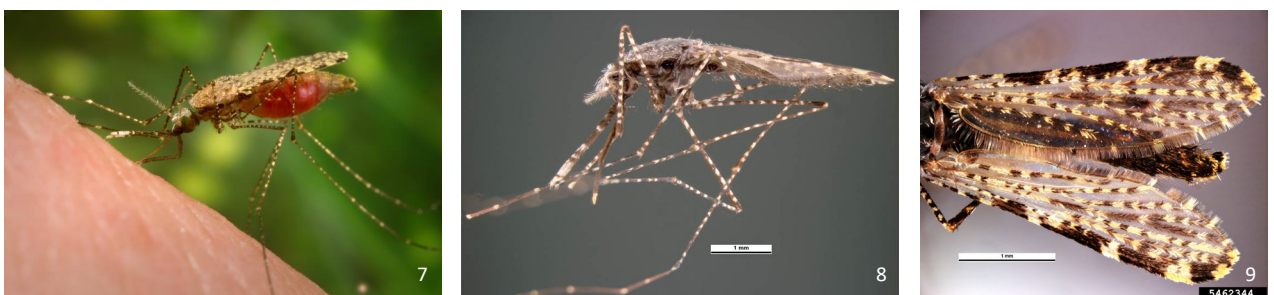

- Pale yellow-brown to dark brown coloured back
- Long and thin legs (no stripes)
- Wing often have patched markings
